# Supplementary material
Source: Springer Nature journal article supplement (https://www.springermedizin.de/resource/supplementary/10194_2013_570_MOESM1_ESM.pdf/9422698)
Supplement: MOESM1 [file 9422698]

## ONLINE REFERENCES

- e1. Kurth T, Gaziano JM, Cook NR, Logroscino G, Diener HC, Buring JE (2006) Migraine and risk of cardiovascular disease in women. *JAMA* 296:283–291.
- e2. Kurth T, Gaziano JM, Cook NR, Bubes V, Logroscino G, Diener HC, Buring JE (2007) Migraine and risk of cardiovascular disease in men. *Arch Intern Med* 167:795–801.
- e3. Becker C, Brobert GP, Almqvist PM, Johansson S, Jick SS, Meier CR (2007) Migraine and the risk of stroke, TIA, or death in the UK (CME). *Headache* 47:1374–1384.
- e4. Bigal ME, Kurth T, Santanello N, Buse D, Golden W, Robbins M, Lipton RB (2010) Migraine and cardiovascular disease: a population-based study. *Neurology* 74:628–635.
- e5. Bushnell CD, Jamison M, James AH (2009) Migraines during pregnancy linked to stroke and vascular diseases: US population based case-control study. *BMJ* 338:b664.
- e6. Carolei A, Marini C, Nencini P, Gandolfo C, Motto C, Zanette E, Prencipe M, Fieschi C, National Research Council Study Group (1995) Prevalence and outcome of symptomatic carotid lesions in young adults. *BMJ* 310:1363–1366.
- e7. Carolei A, Marini C, De Matteis G (1996). History of migraine and risk of cerebral ischaemia in young adults. The Italian National Research Council Study Group on Stroke in the Young. *Lancet* 347:1503–1506.
- e8. Chang CL, Donaghy M, Poulter N (1999) Migraine and stroke in young women: case-control study. The World Health Organization Collaborative Study of Cardiovascular Disease and Steroid Hormone Contraception. *BMJ* 318:13–18.

- e9. Collaborative Group for the Study of Stroke in Young Women (1975) Oral contraceptives and stroke in young women: associated risk factors. *JAMA* 231:718–722.
- e10. Hall GC, Brown MM, Mo J, MacRae K (2004) Triptans in migraine: the risks of stroke, cardiovascular disease, and death in practice. *Neurology* 62:563–568.
- e11. Henrich JB, Horwitz RI (1989) A controlled study of ischemic stroke risk in migraine patients. *J Clin Epidemiol* 42:773–780.
- e12. Kurth T, Slomke MA, Kase CS, Cook NR, Lee IM, Gaziano JM, Diener HC, Buring JE (2005) Migraine, headache, and the risk of stroke in women: a prospective study. *Neurology* 64:1020–1026.
- e13. Lidegaard O (1995) Oral contraceptives, pregnancy and the risk of cerebral thromboembolism: the influence of diabetes, hypertension, migraine and previous thrombotic disease. *Br J Obstet Gynaecol* 102:153–159.
- e14. Lidegaard O, Kreiner S (2002) Contraceptives and cerebral thrombosis: a five-year national case-control study. *Contraception* 65:197–205.
- e15. MacClellan LR, Giles W, Cole J, Wozniak M, Stern B, Mitchell BD, Kittner SJ (2007) Probable migraine with visual aura and risk of ischemic stroke: the Stroke Prevention in Young Women study. *Stroke* 38:2438–2445.
- e16. Marini C, Carolei A, Roberts RS, Prencipe M, Gandolfo C, Inzitari D, Landi G, De Zanche L, Scoditti U, Fieschi C (1993) Focal cerebral ischemia in young adults: a collaborative case-control study. *Neuroepidemiology* 12:70–81.

- e17. Merikangas KR, Fenton BT, Cheng SH, Stolar MJ, Risch N (1997) Association between migraine and stroke in a large-scale epidemiological study of the United States. *Arch Neurol* 54:362–368.
- e18. Nightingale AL, Farmer RD (2004) Ischemic stroke in young women: a nested case-control study using the UK General Practice Research Database. *Stroke* 35:1574–1578.
- e19. Rist PM, Buring JE, Kase CS, Schürks M, Kurth T (2010) Migraine and functional outcome from ischemic cerebral events in women. *Circulation* 122:2551–2557.
- e20. Stang PE, Carson AP, Rose KM, Mo J, Ephross SA, Shahar E, Szklo M (2005) Headache, cerebrovascular symptoms, and stroke: the Atherosclerosis Risk in Communities Study. *Neurology* 64:1573–1577.
- e21. Tzourio C, Tehindrazanarivelo A, Iglésias S, Alpérovitch A, Chedru F, d’Anglejan-Chatillon J, Bousser MG (1995) Case-control study of migraine and risk of ischaemic stroke in young women. *BMJ* 310:830–833.
- e22. Tzourio C, Iglésias S, Hubert JB, Visy JM, Alpérovitch A, Tehindrazanarivelo A, Biousse V, Woimant F, Bousser MG (1993) Migraine and risk of ischaemic stroke: a case-control study. *BMJ* 307:289–292.
- e23. Schürks M, Rist PM, Bigal ME, Buring JE, Lipton RB, Kurth T (2009) Migraine and cardiovascular disease: systematic review and meta-analysis. *BMJ* 339: b3914.
- e24. Spector JT, Kahn SR, Jones MR, Jayakumar M, Dalal D, Nazarian S (2010) Migraine headache and ischemic stroke risk: an updated meta-analysis. *Am J Med* 123:612–624.

- e25. Etminan M, Takkouche B, Isorna FC, Samii A (2005) Risk of ischaemic stroke in people with migraine: systematic review and meta-analysis of observational studies. *BMJ* 330:63.
- e26. Buring JE, Hebert P, Romero J, Kittross A, Cook N, Manson J, Peto R, Hennekens C (1995) Migraine and subsequent risk of stroke in the Physicians' Health Study. *Arch Neurol* 52:129-134.
- e27. Carter KN, Anderson N, Jamrozik K, Hankey G, Anderson CS (2005) Migraine and risk of subarachnoid hemorrhage: a population-based case-control study. *J Clin Neurosci* 12:534-537.
- e28. Kuo CY, Yen MF, Chen LS, Fann CY, Chiu YH, Chen HH, Pan SL (2013) Increased risk of hemorrhagic stroke in patients with migraine: a population-based cohort study. *PLoS One* 8: e55253.
- e29. Kurth T, Kase CS, Schürks M, Tzourio C, Buring JE (2010) Migraine and risk of haemorrhagic stroke in women: prospective cohort study. *BMJ* 341:c3659.
- e30. Sacco S, Ornello R, Ripa P, Pistoia F, Carolei A (2013) Migraine and hemorrhagic stroke: a meta-analysis. *Stroke* 2013 in press
- e31. Ahmed B, Bairey Merz CN, McClure C, Johnson BD, Reis SE, Bittner V, Pepine CJ, Sharaf BL, Sopko G, Kelsey SF, Shaw L (2006) Migraines, angiographic coronary artery disease and cardiovascular outcomes in women. *Am J Med* 119:670-675.
- e32. Mitchell P, Wang JJ, Currie J, Cumming RG, Smith W. Prevalence and vascular associations of migraine in older Australians. *Aust N Z J Med* 28:627-632.

- e33. Rose KM, Carson AP, Sanford CP, Stang PE, Brown CA, Folsom AR, Szklo M (2004) Migraine and other headaches: associations with Rose angina and coronary heart disease. *Neurology* 63:2233–2239.
- e34. Rose KM, Wong TY, Carson AP, Couper DJ, Klein R, Sharrett AR (2007) Migraine and retinal microvascular abnormalities: the Atherosclerosis Risk in Communities study. *Neurology* 68:1694–1700.
- e35. Liew G, Mitchell P, Wong TY, Wang JJ (2006) Retinal vascular caliber and migraine: the Blue Mountains Eye study. *Headache* 46:997–1004.
- e36. Jurno ME, Chevtchouk L, Nunes AA, de Rezende DF, Jevoux Cda C, de Souza JA, Moreira Filho PF (2010) Ankle-brachial index, a screening for peripheral obstructive arterial disease, and migraine - a controlled study. *Headache* 50:626–630.
- e37. Ikeda K, Hirayama T, Iwamoto K, Takazawa T, Kawase Y, Yoshii Y, Kano O, Kawabe K, Tamura M, Iwasaki Y (2011) Pulse wave velocity study in middle-aged migraineurs at low cardiovascular disease risk. *Headache* 51:1239–1244.
- e38. Kruit MC, van Buchem MA, Hofman PA, Bakkers JT, Terwindt GM, Ferrari MD, Launer LJ (2004) Migraine as a risk factor for subclinical brain lesions. *JAMA* 291:427–434.
- e39. Kurth T, Mohamed S, Maillard P, Zhu YC, Chabriat H, Mazoyer B, Boussier MG, Dufouil C, Tzourio C (2011) Headache, migraine, and structural brain lesions and function: population based Epidemiology of Vascular Ageing-MRI study. *BMJ (Clin Res Ed)* 342:c7357.

e40. Scher AI, Gudmundsson LS, Sigurdsson S, Ghambaryan A, Aspelund T, Eikirdottir G, van Buchem MA, Gunadson V, Launer LJ (2009) Migraine headache in middle age and late-life brain infarcts. *JAMA* 301:2563–2570.

e41. Swartz RH, Kern RZ (2004) Migraine is associated with magnetic resonance imaging white matter abnormalities: a meta-analysis. *Arch Neurol* 61:1366–1368.

e42. Hoekstra-van Dalen RA, Cillessen JP, Kappelle LJ, van Gijn J (1996) Cerebral infarcts associated with migraine: clinical features, risk factors and follow-up. *J Neurol* 243:511–515.

e43. Bashir A, Lipton RB, Ashina B, Ashina M (2013) Migraine and structural changes in the brain: A systematic review and meta-analysis. *Neurology* 81:1–9.
